# Supplementary material
Source: PubMed Central journal article supplement (PMC3092267)

**Figure S1. Induction of apoptosis of FLT3-ITD-expressing cells by AFG206 and AFG210.** Induction of apoptosis following an approximately 3-day treatment of FLT3-ITD-Ba/F3 cells (+/- IL-3) with AFG206 (A), AFG210 (B).

**Figure S2. Induction of apoptosis of FLT3-ITD-expressing cells by AHL196.** Induction of apoptosis following an approximately 3-day treatment of FLT3-ITD-Ba/F3 cells (+/- IL-3) with AHL196 (C).

**Figure S3 (A-C). Inhibition of D835Y-FLT3 by first generation FLT3 inhibitors, AFG206 and AFG210: Effects of drug treatment on cell proliferation and FLT3 kinase activity.** Approximately 3-day treatment of D835Y-Ba/F3 cells (+/- IL-3) with AFG206 (A) and AFG210 (B). (C) FLT3 I.P./western.

**Figure S3 (D-E). Inhibition of STAT and MAPK signaling in FLT3-ITD-Ba/F3 cells by AFG206, AFG210, AUZ454, and PKC412.** Whole cell lysate western, showing approximately 1.5 hr treatments of FLT3-ITD-Ba/F3 cells with AFG206 and AFG210 at 1  $\mu$ M, each, and AUZ454 and PKC412 at 0.1  $\mu$ M each. (D) pSTAT5 and total STAT5 immunoblot. (E) pMAPK and total MAPK immunoblot. FLT3 expression is shown in (D) and (E).  $\beta$ -actin was used as a loading control.

**Figure S4. Inhibition of FLT3-ITD and D835Y-FLT3 by first generation FLT3 inhibitor, AHL196: Effects of drug treatment on cell proliferation and FLT3 kinase activity.** (A) Approximately 3-day treatment of Ba/F3 cells and FLT3-ITD-Ba/F3 cells (+/- IL-3) with AHL196. (B) FLT3 I.P./western. (C) Approximately 3-day treatment of D835Y-Ba/F3 cells (+/- IL-3) with AHL196. (D) FLT3 I.P./western.

**Figure S5. Induction of apoptosis of D835Y-expressing cells by AFG206 and AFG210.** Induction of apoptosis following an approximately 3-day treatment of D835Y-Ba/F3 cells (+/- IL-3) with AFG206 (A), AFG210 (B).

**Figure S6. Effects of combining AFG206 and PKC412 against FLT3-ITD-expressing cells.** (A,B) Approximately 3-day treatment of FLT3-ITD-Ba/F3 cells with AFG206 +/- PKC412. Combination indices derived through CalcuSyn analysis: For (A): ED25: 1.17352; ED50: 0.98134; ED75: 0.84594; ED90: 0.75205. For (B) ED25: 1.26327; ED50: 0.99946; ED75: 0.86489; ED90: 0.82517. Values 0.3-0.7 indicate synergy. Values 0.7-0.85 indicate moderate synergy. Values 0.85-0.90 indicate slight synergy. Values 0.9-1.1 indicate nearly additive effects. Values 1.10-1.20 indicate slight antagonism. Values 1.20-1.45 indicate moderate antagonism. Values 1.45-3.3 indicate antagonism. (C,D) Approximately 3-day treatment of FLT3-ITD-Ba/F3 cells with AFG206 +/- PKC412.

**Figure S7. Effects of combining AFG210 and PKC412 against FLT3-ITD-expressing cells.** (A,B) Approximately 3-day treatment of FLT3-ITD-Ba/F3 cells with AFG210 +/- PKC412. Combination indices derived through CalcuSyn analysis: For (A): ED25: 0.71176; ED50: 0.75521; ED75: 0.80562; ED90: 0.86468. For (B): ED25: 1.38015; ED50: 1.19545; ED75: 1.03756; ED90: 0.90241. Values 0.3-0.7 indicate synergy. Values 0.7-0.85 indicate moderate synergy. Values 0.85-0.90 indicate slight synergy. Values 0.9-1.1 indicate nearly additive effects. Values 1.10-1.20 indicate slight antagonism. Values 1.20-1.45 indicate

moderate antagonism. Values 1.45-3.3 indicate antagonism. (C,D) Approximately 3-day treatment of FLT3-ITD-Ba/F3 cells with AFG210 +/- PKC412.

**Figure S8. Inhibition of N841I-FLT3 by second generation FLT3 inhibitors, NVP-AUZ454 and NVP-ATH686: Effects on cell proliferation and FLT3 kinase activity.** (A,B) Three-day treatment of FLT3-N841I-Ba/F3 cells, in the presence and absence of IL-3, with NVP-AUZ454 (A) and ATH686 (B). (C) Treatment of FLT3-N841I-Ba/F3 cells for 15 minutes with 10 or 100 nM NVP-ATH686 or NVP-AUZ454, respectively.

**Figure S9. Inhibition of D835Y-FLT3 by second generation FLT3 inhibitors, NVP-AUZ454 and NVP-ATH686: Effects on cell proliferation and viability.** Three-day treatment of D835Y-Ba/F3 cells, in the presence and absence of IL-3, with NVP-AUZ454 (A) and NVP-ATH686 (D). Parental Ba/F3 cells are treated as a control by both agents (A,D). Effects of NVP-AUZ454 (B) and NVP-ATH686 (B) on viability of D835Y-Ba/F3 cells, in the absence of IL-3. Effects of NVP-AUZ454 (C) and NVP-ATH686 (F) on viability of parental Ba/F3 cells following 3 days of treatment.

**Figure S10. Human serum protein binding capacity of second generation FLT3 inhibitors.** (A) Approximately 3-day treatment of FLT3-ITD-Ba/F3 cells with AFG206 in the presence of 10% human serum or 10% fetal calf serum. (B) Approximately 3-day treatment of FLT3-ITD-Ba/F3 cells with AFG210 in the presence of 10% human serum or 10% fetal calf serum. (C) Approximately 3-day treatment of FLT3-ITD-Ba/F3 cells with AHL196 in the presence of 10% human serum or 10% fetal calf serum. (D) Efficacy of NVP-AUZ454 against FLT3-ITD-Ba/F3 cells cultured for 66 hours in presence of fetal calf serum versus human serum. (E) Efficacy of NVP-ATH686 against FLT3-ITD-Ba/F3 cells cultured for 66 hours in presence of fetal calf serum versus human serum.

**Figure S11. Inhibition of proliferation of mutant FLT3-positive AML patient cells by NVP-AUZ454 and NVP-ATH686.** (A, B) Three day treatment of AML FLT3-ITD-expressing patient cells versus FLT3-ITD-Ba/F3 cells with NVP-AUZ454 (A) or NVP-ATH686 (B).

AML patient FLT3 mutation status (published previously, Weisberg et al., 2008)

AML4: ITD (42 bp), 89% variant allele

AML5: TKD, D835Y, 4% variant allele

AML patient disease status

| Sample | Blood/Marrow | PT-ID | FAB | WBC   | PB BLAST | HCT  | BM BLAST | CHROM |
|--------|--------------|-------|-----|-------|----------|------|----------|-------|
| AML4   | marrow       | 63F   | M4  | 179.4 | 72%      | 19.4 | 95%      | NL    |
| AML5   | marrow       | 77M   | M1  | 26.3  | 27%      | 23.2 | 92%      | NL    |

**Figure S12. Inhibition of FLT3-ITD and D835Y-FLT3 by “type I” FLT3 inhibitor, AAE871: Effects on cell proliferation and FLT3 kinase activity.**

**Figure S13 (A-B). Over-expression of mutant FLT3 in PKC412- and AAE871-resistant cells.**

**Figure S13 (C-D). STAT and MAPK signaling in AAE871-resistant cells.**

**Figure S14. Cross-resistance of “type I” FLT3 inhibitor-resistant mutant FLT3-expressing cells to “type II” first generation FLT3 inhibitor, AHL196. (A) Approximately 3-day treatment of FLT3-ITD-Ba/F3 and PKC412-resistant cells with AHL196.**

Fig S1

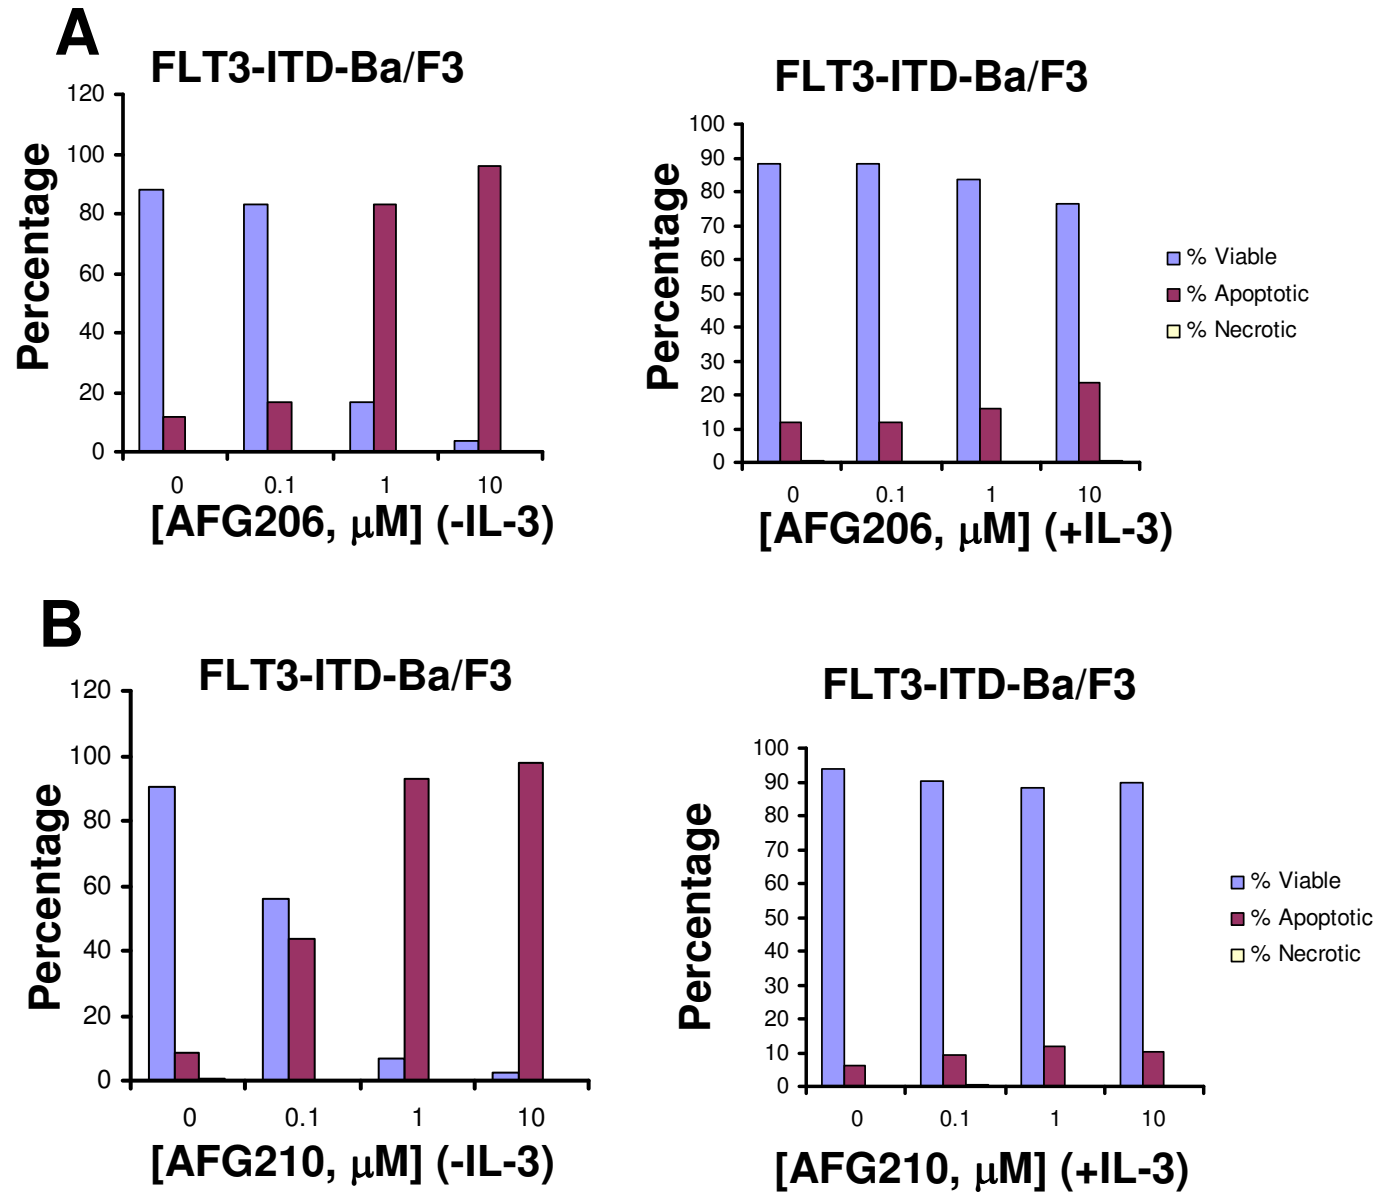

Fig S2

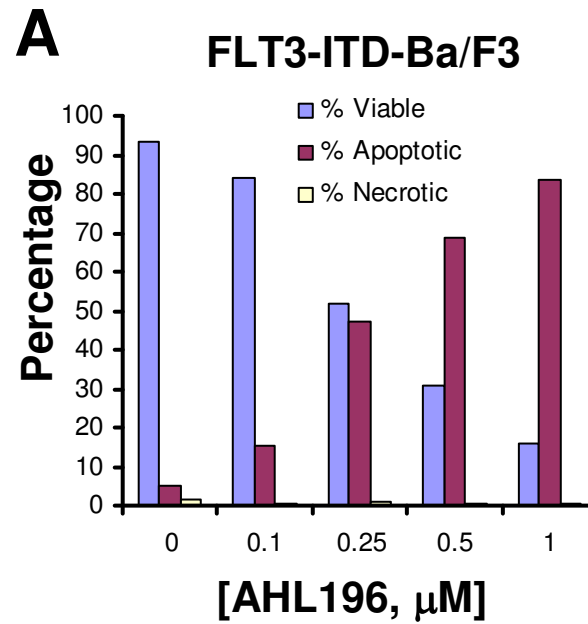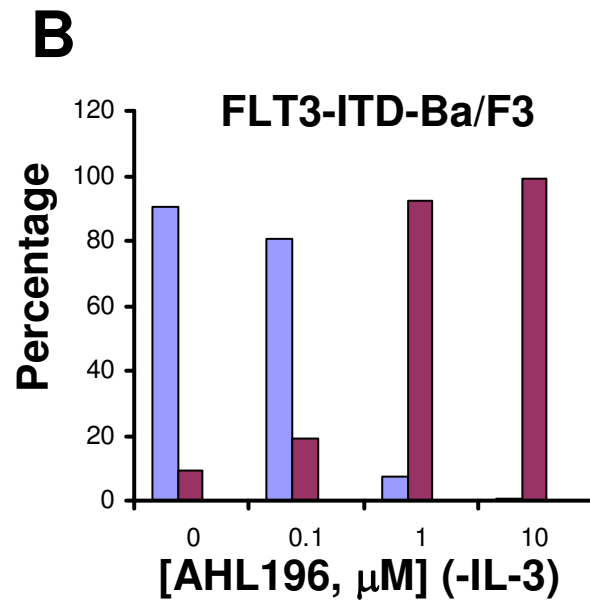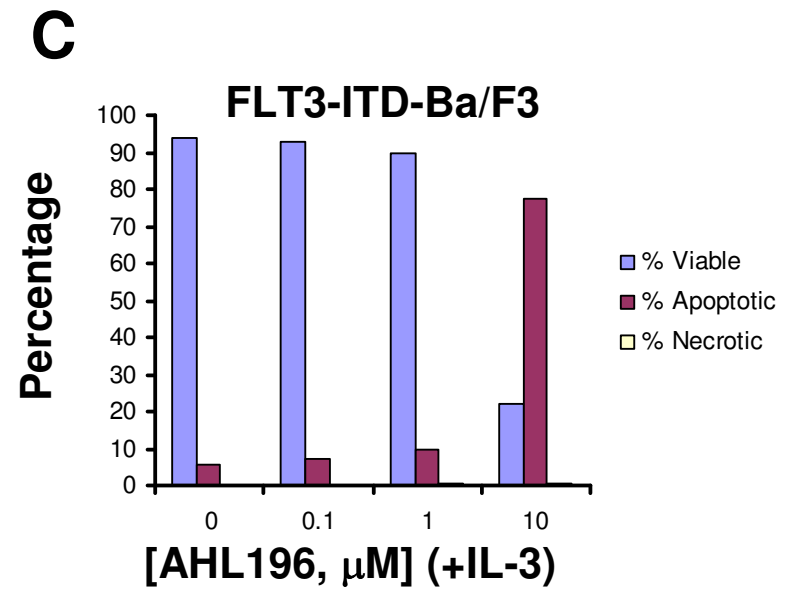

Fig S3 (A-C)

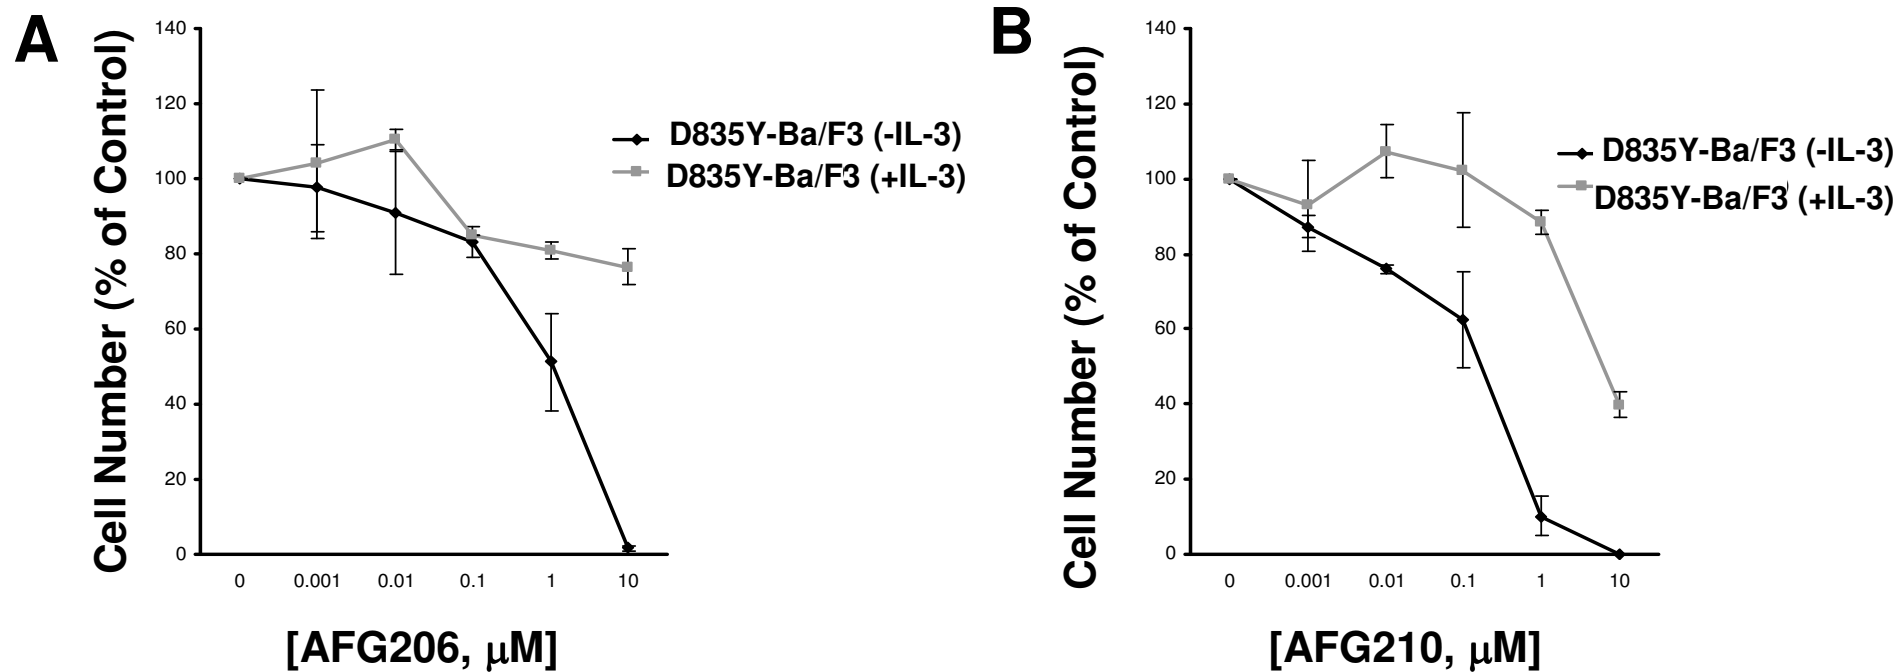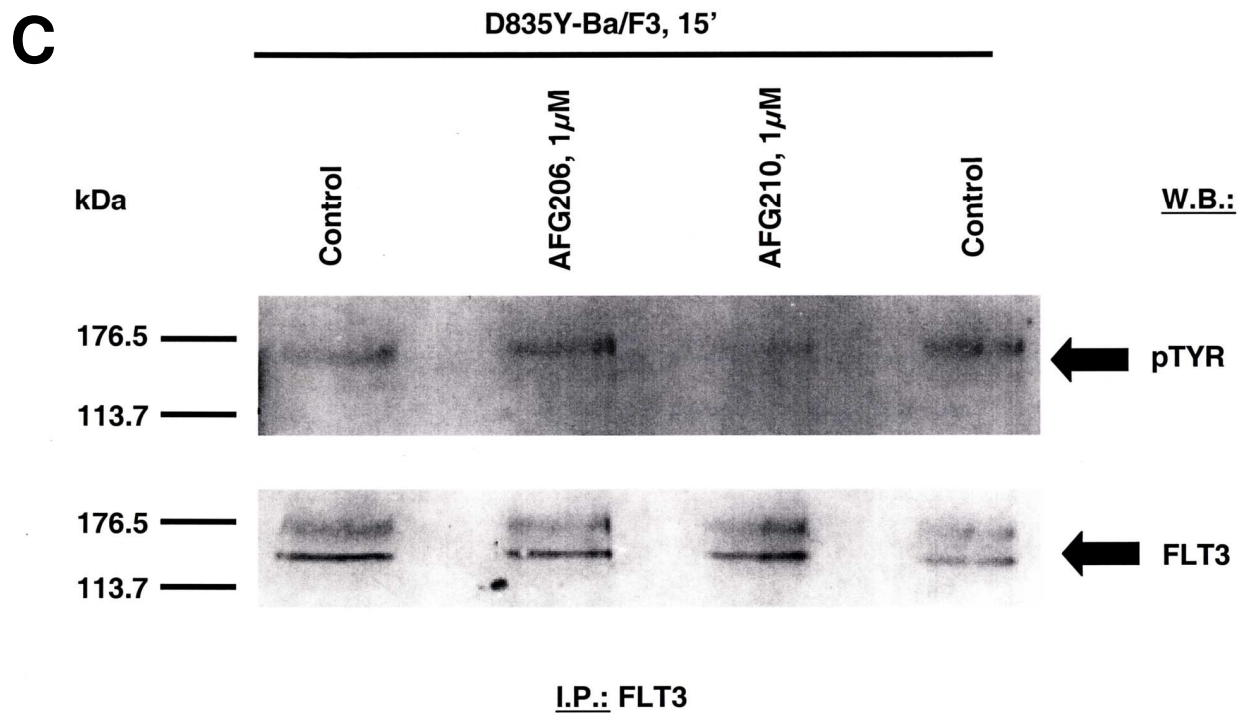

Fig S3 (D-E)

D

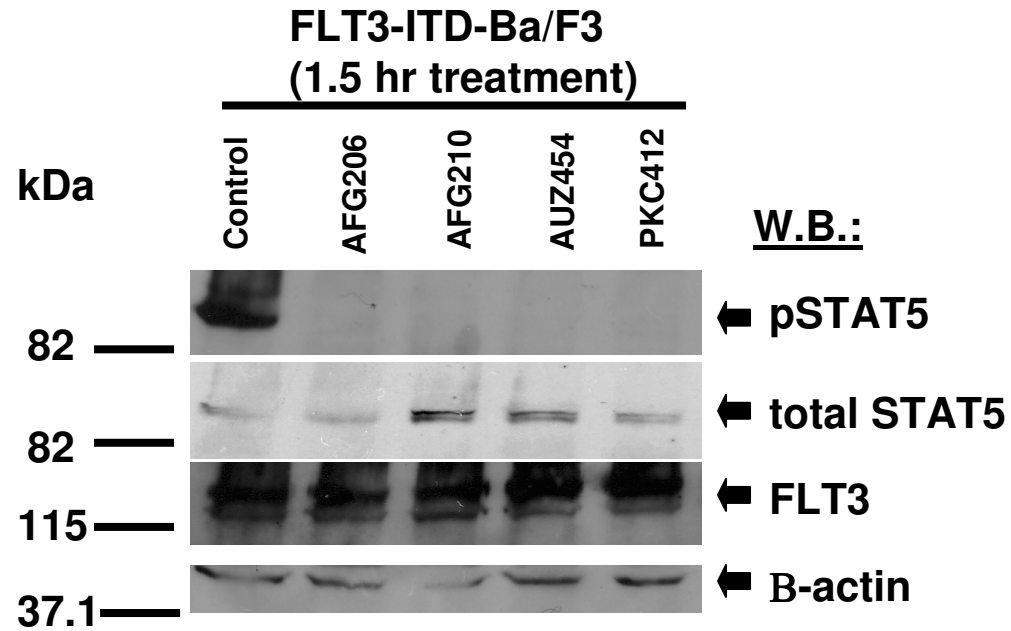

E

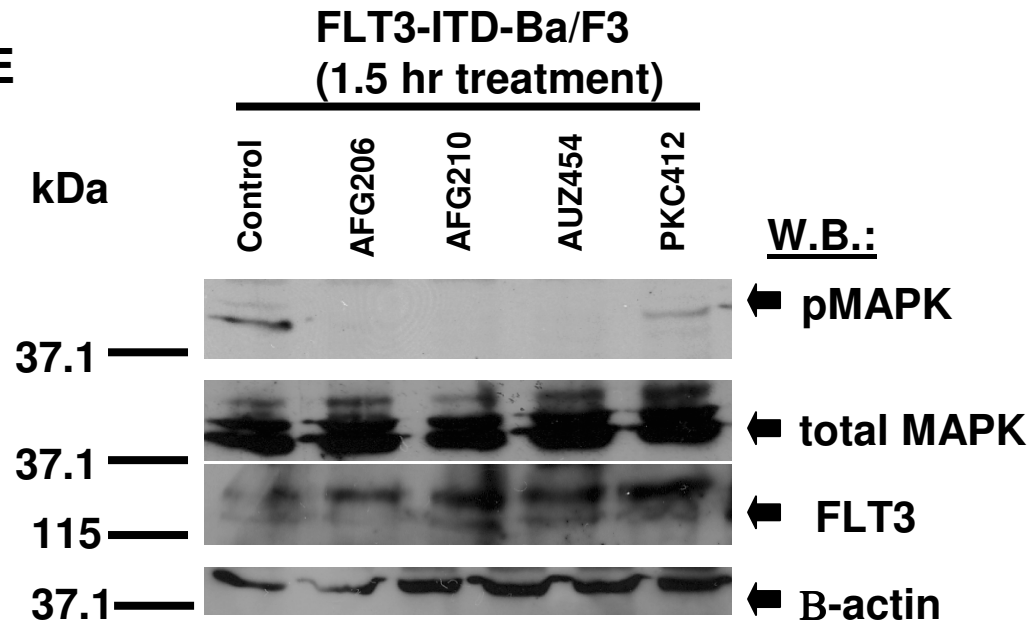

Fig S4

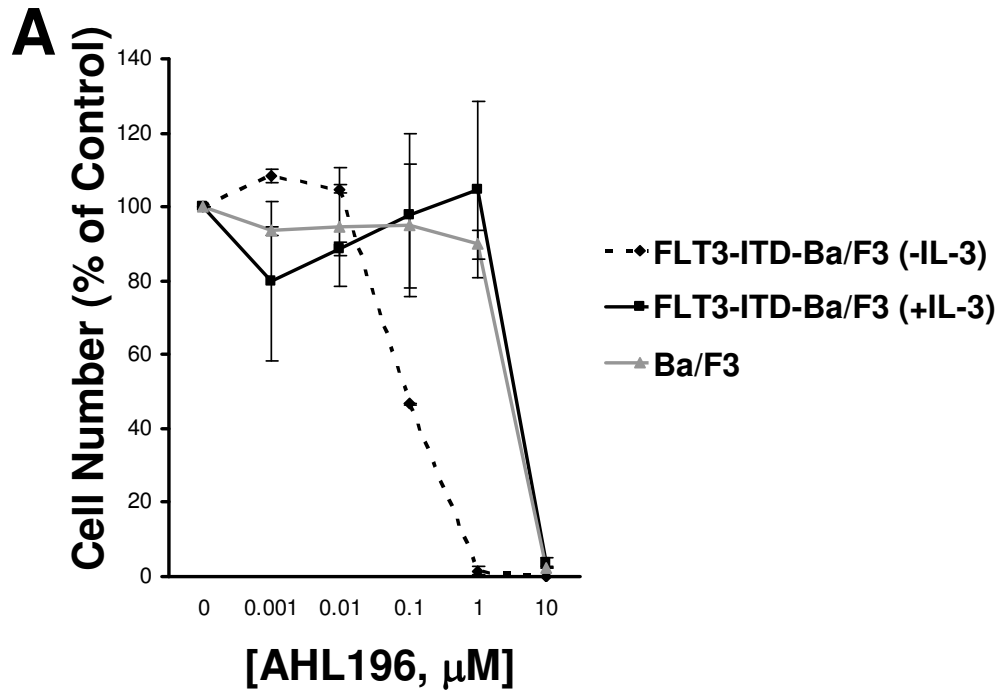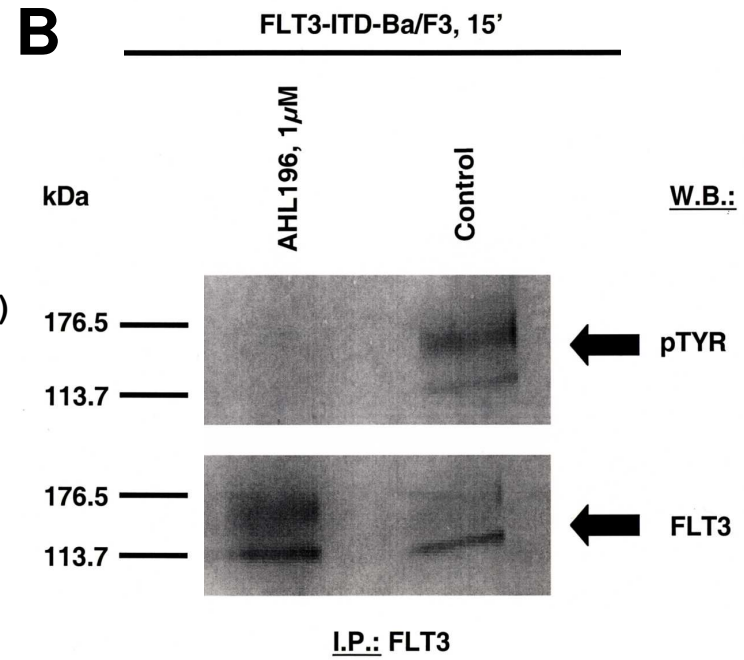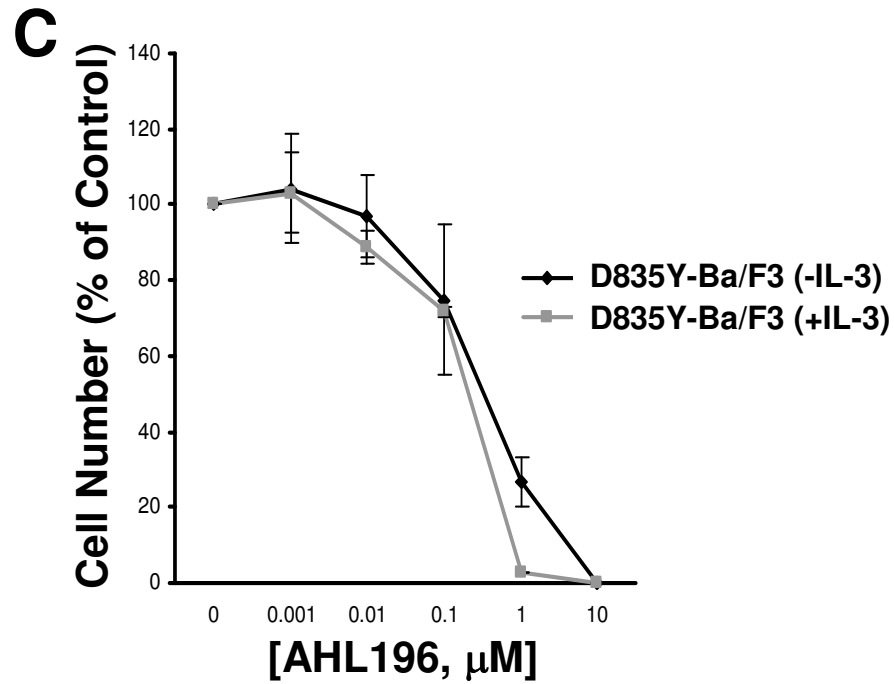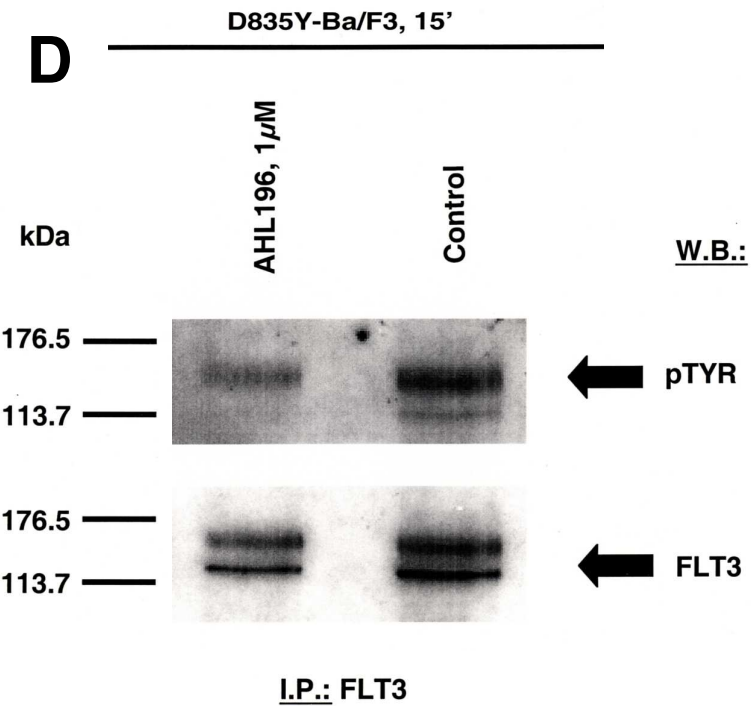



Fig S5

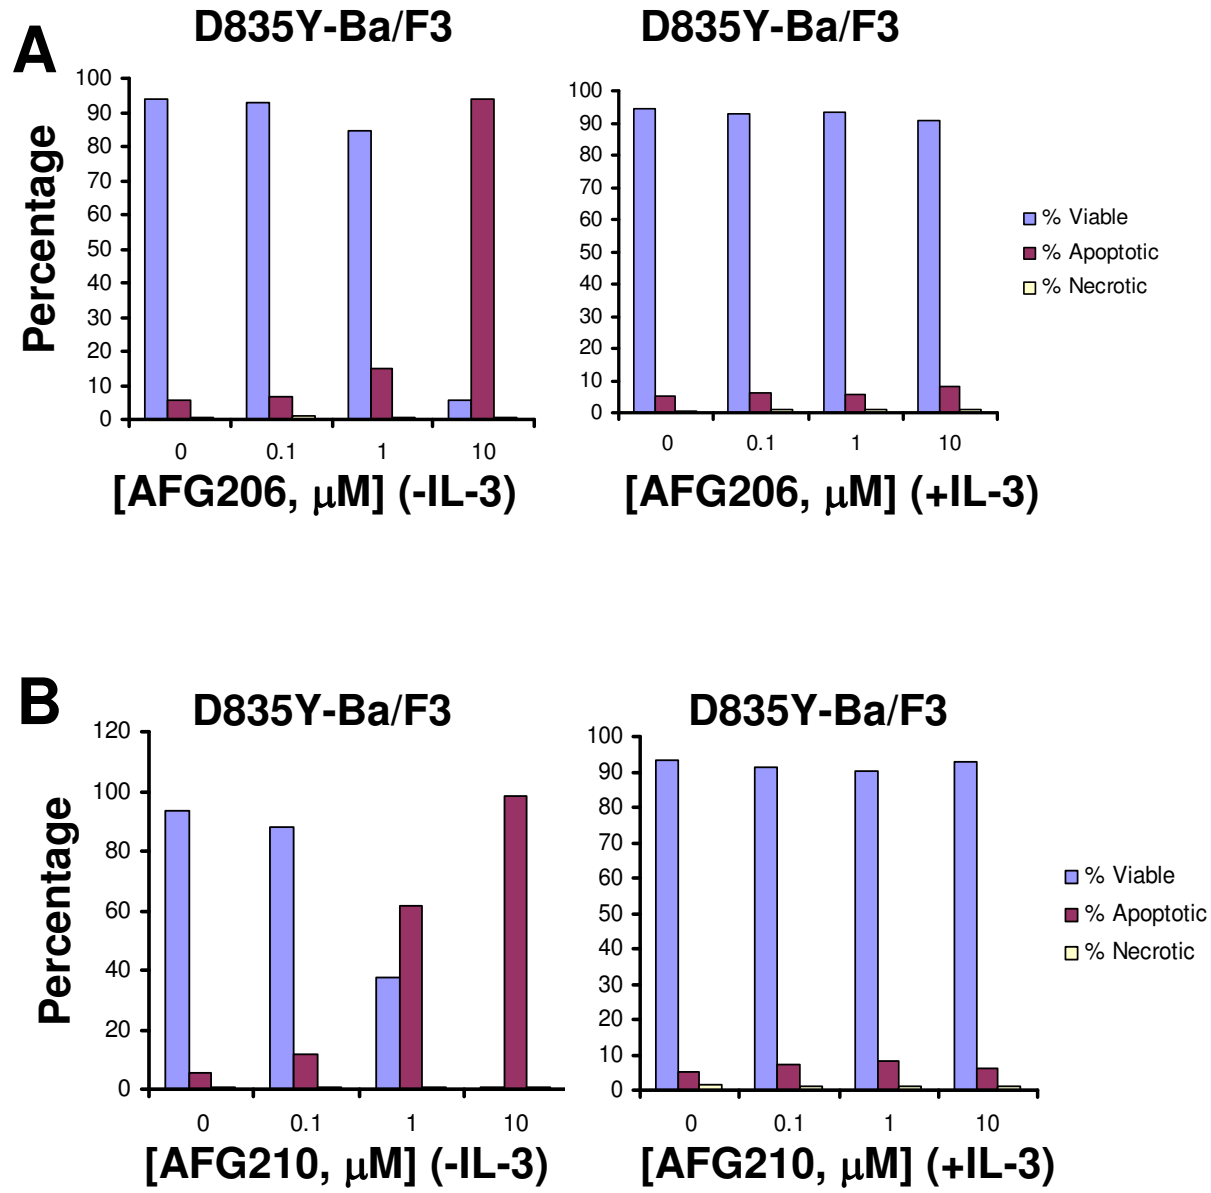

Fig S6

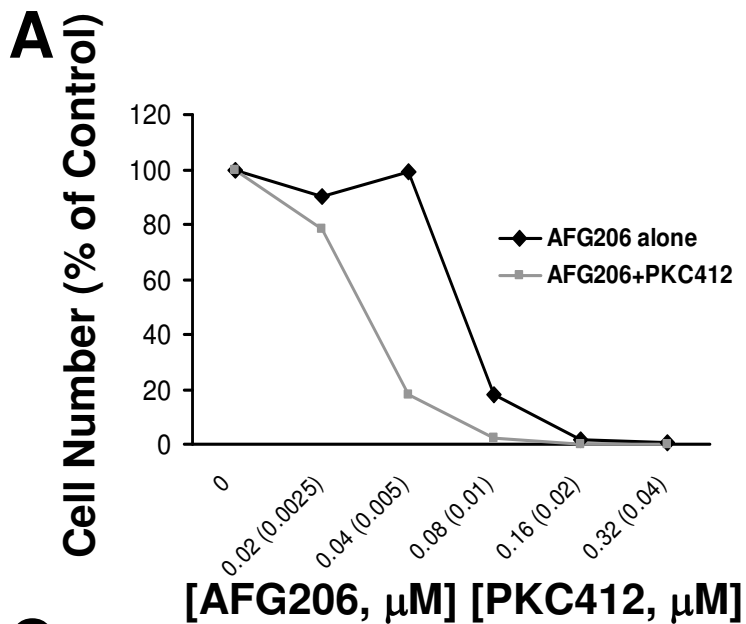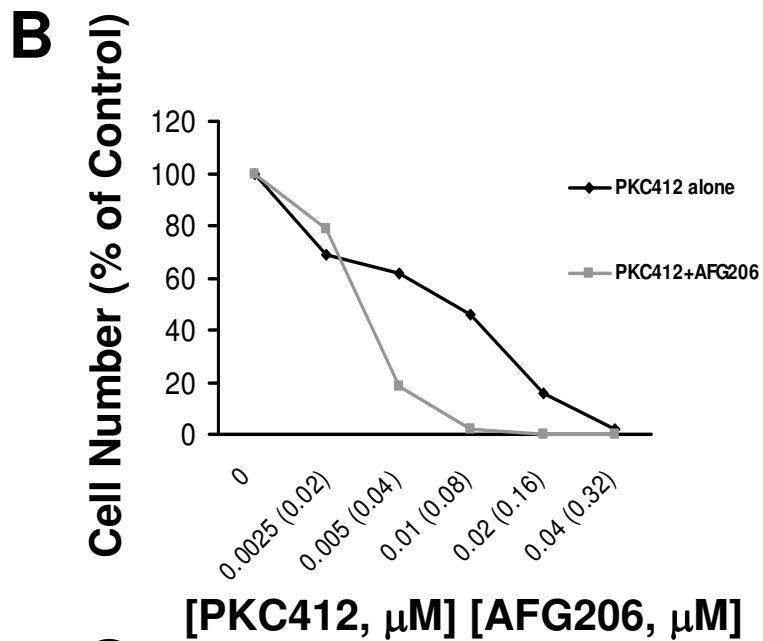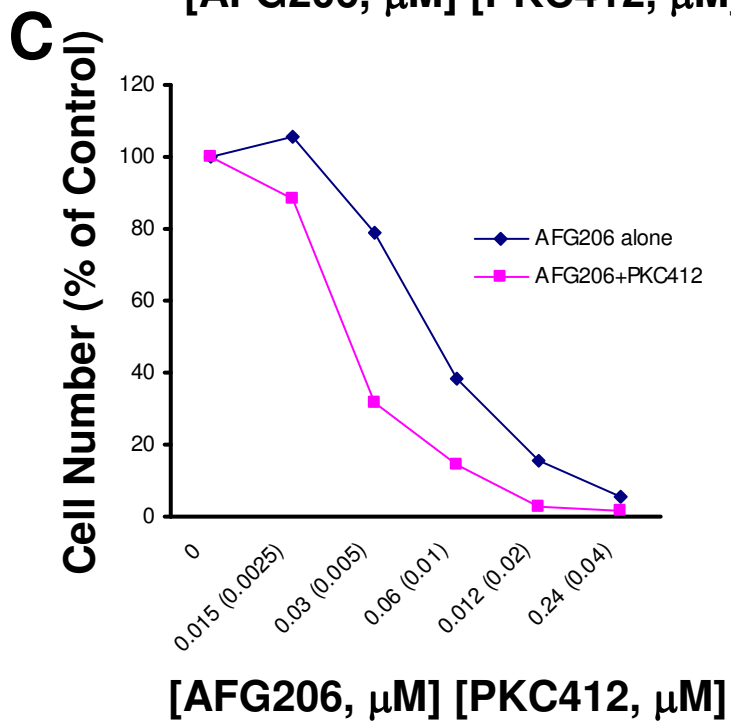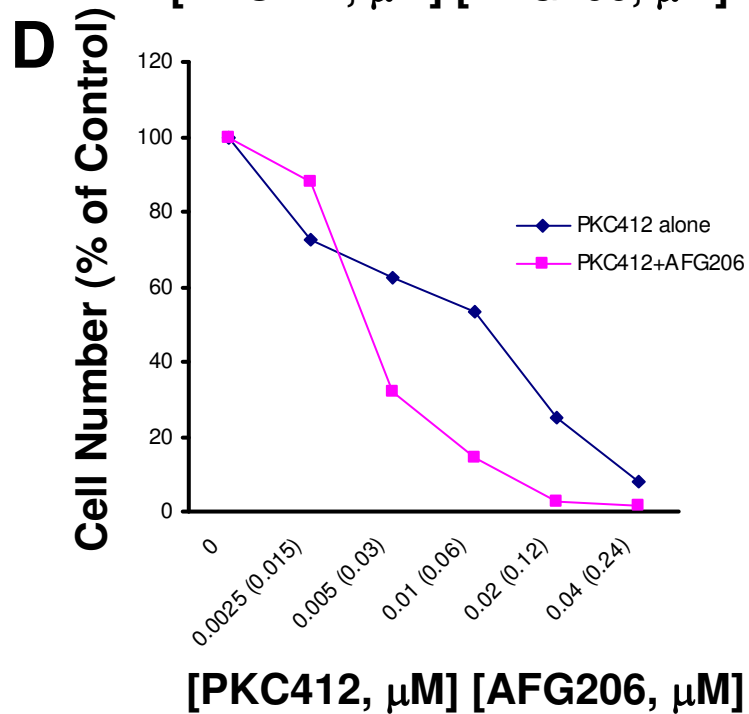

Fig S7

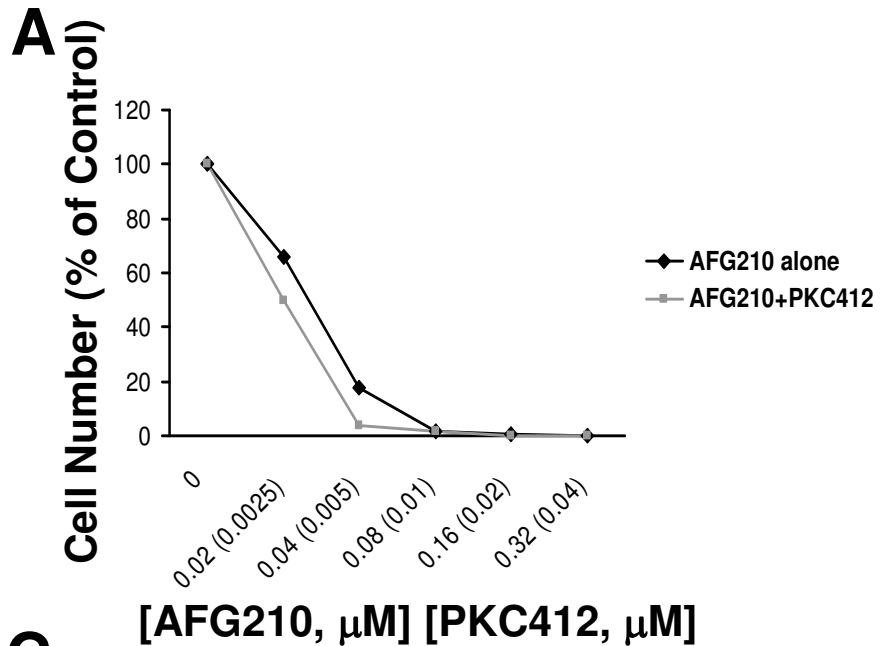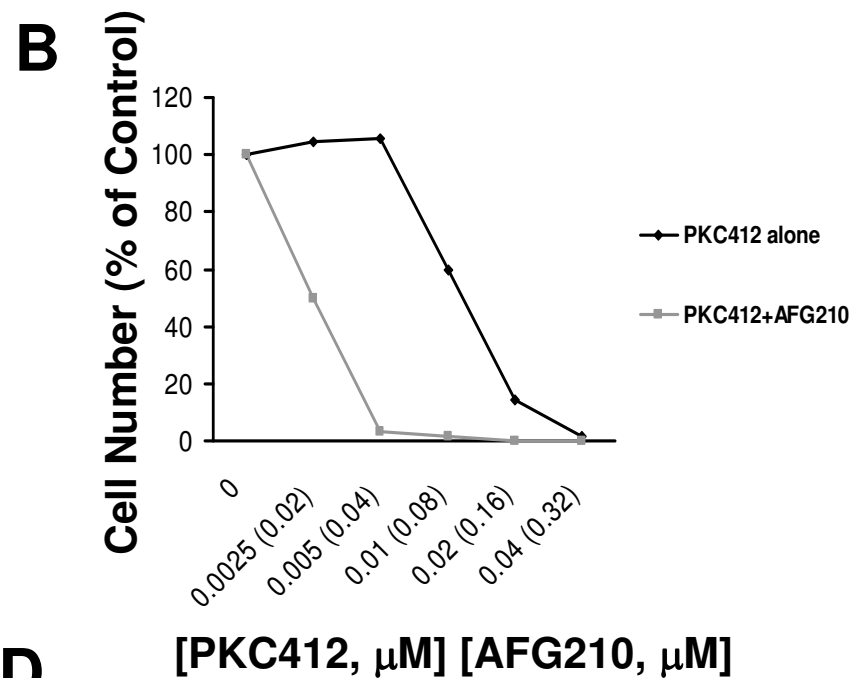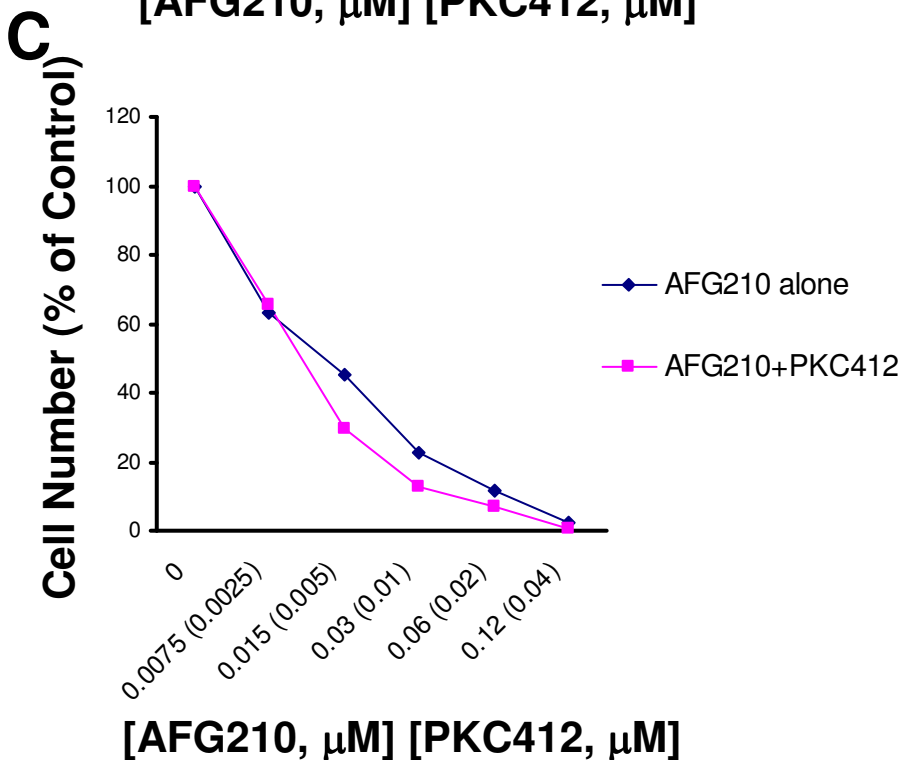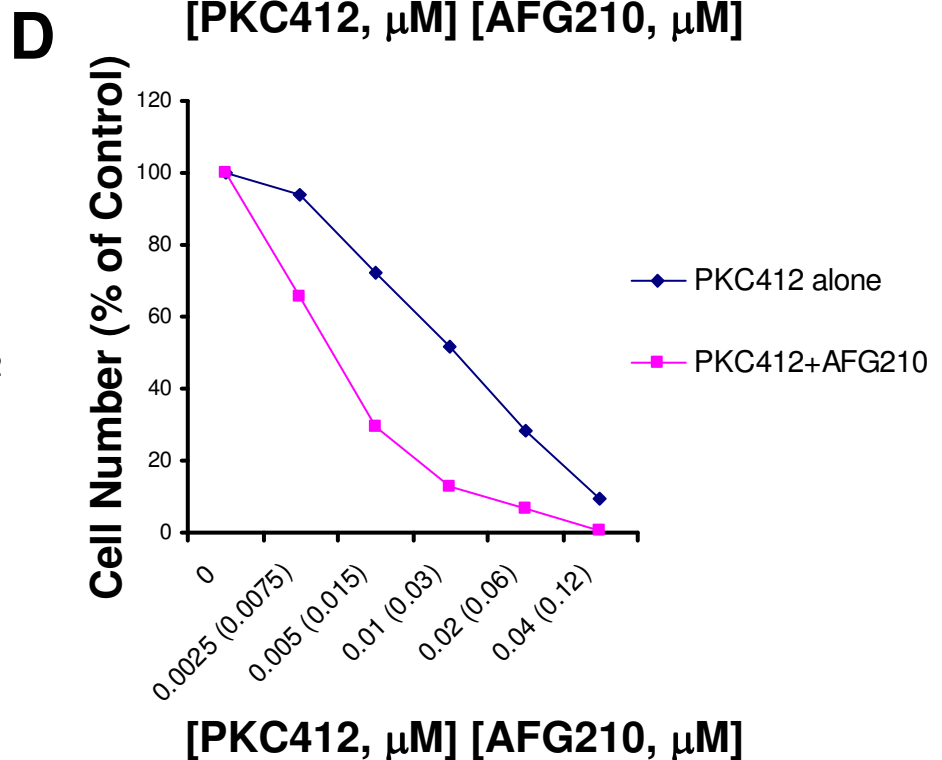

Fig S8

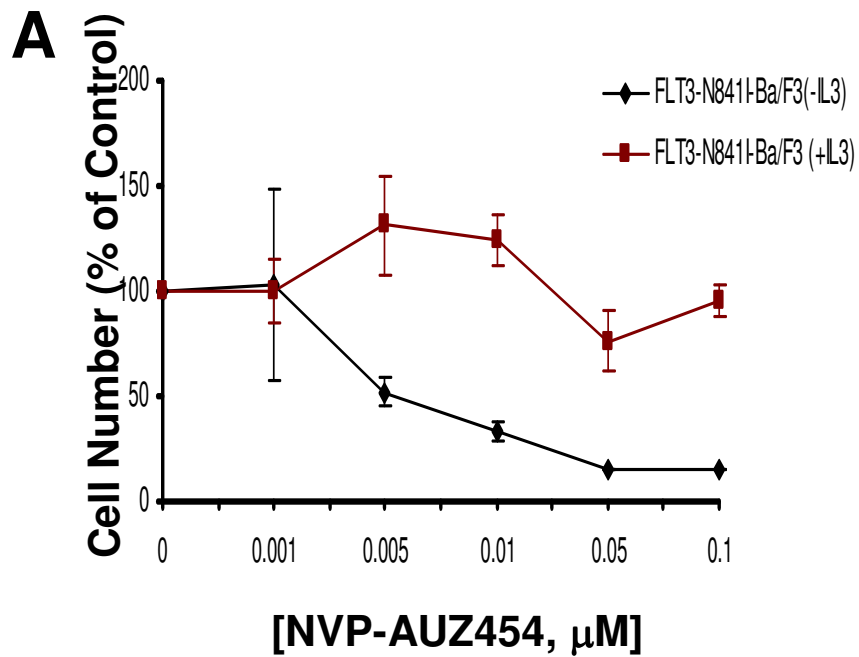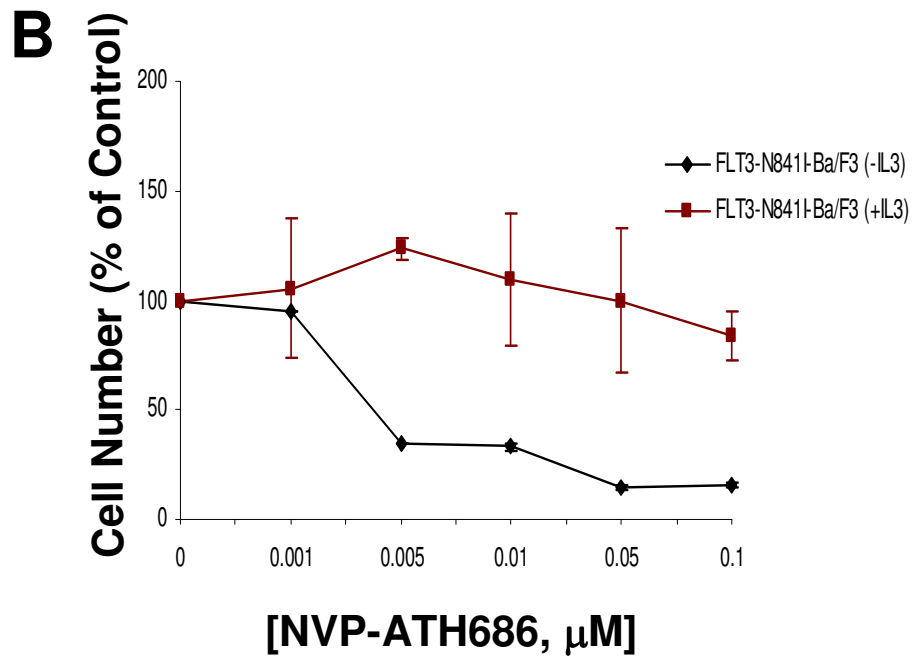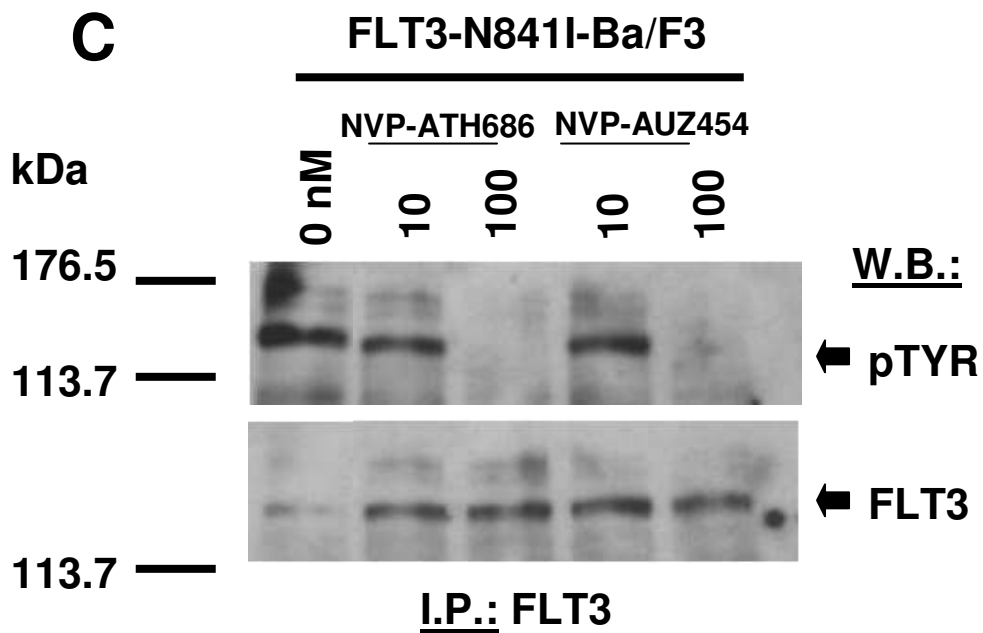

**Fig S9**

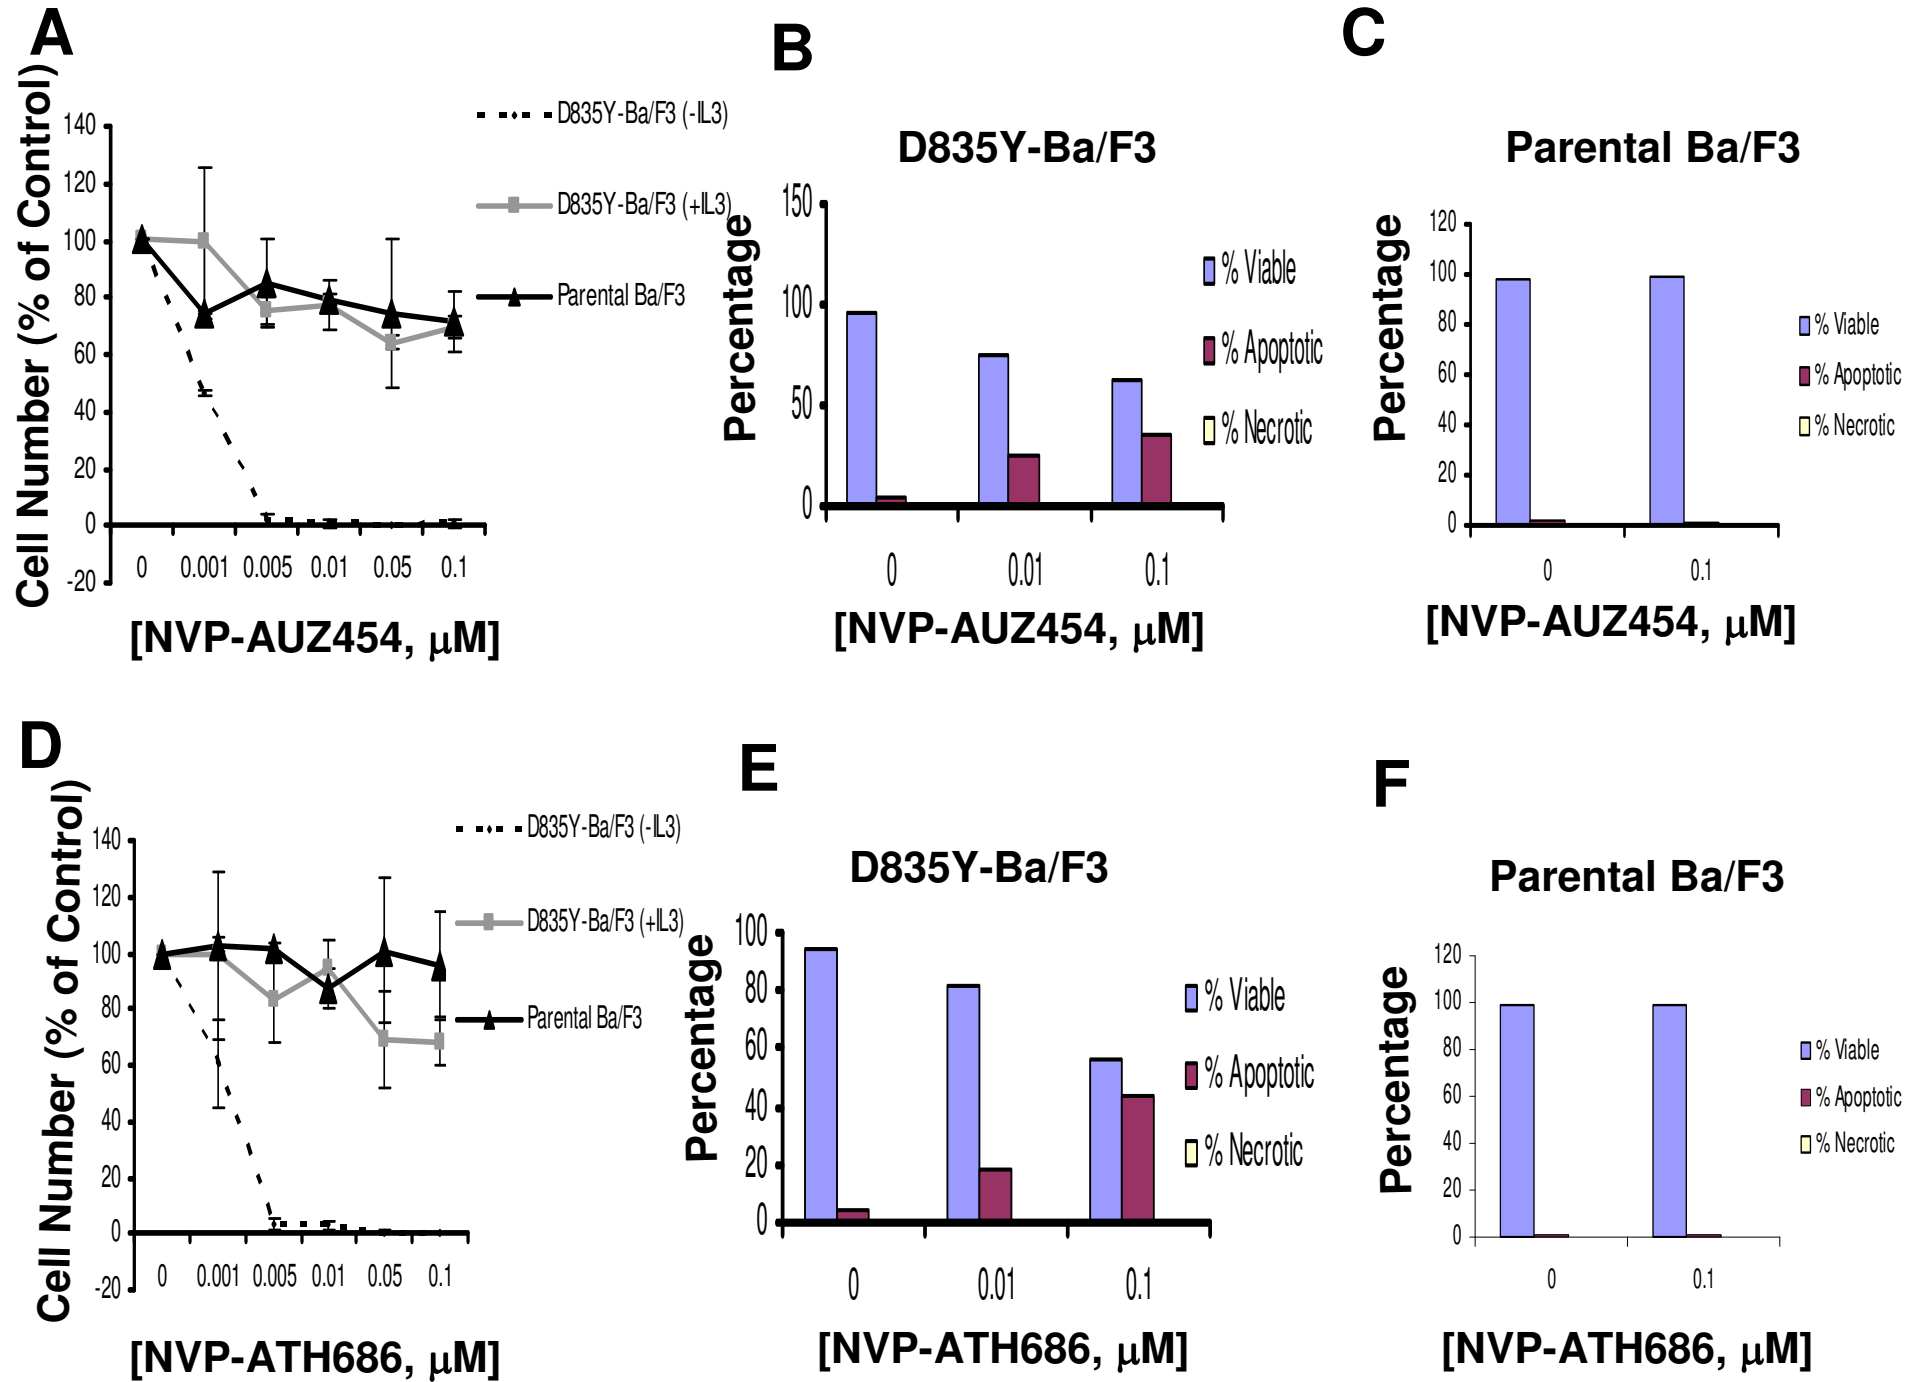

**Fig S10**

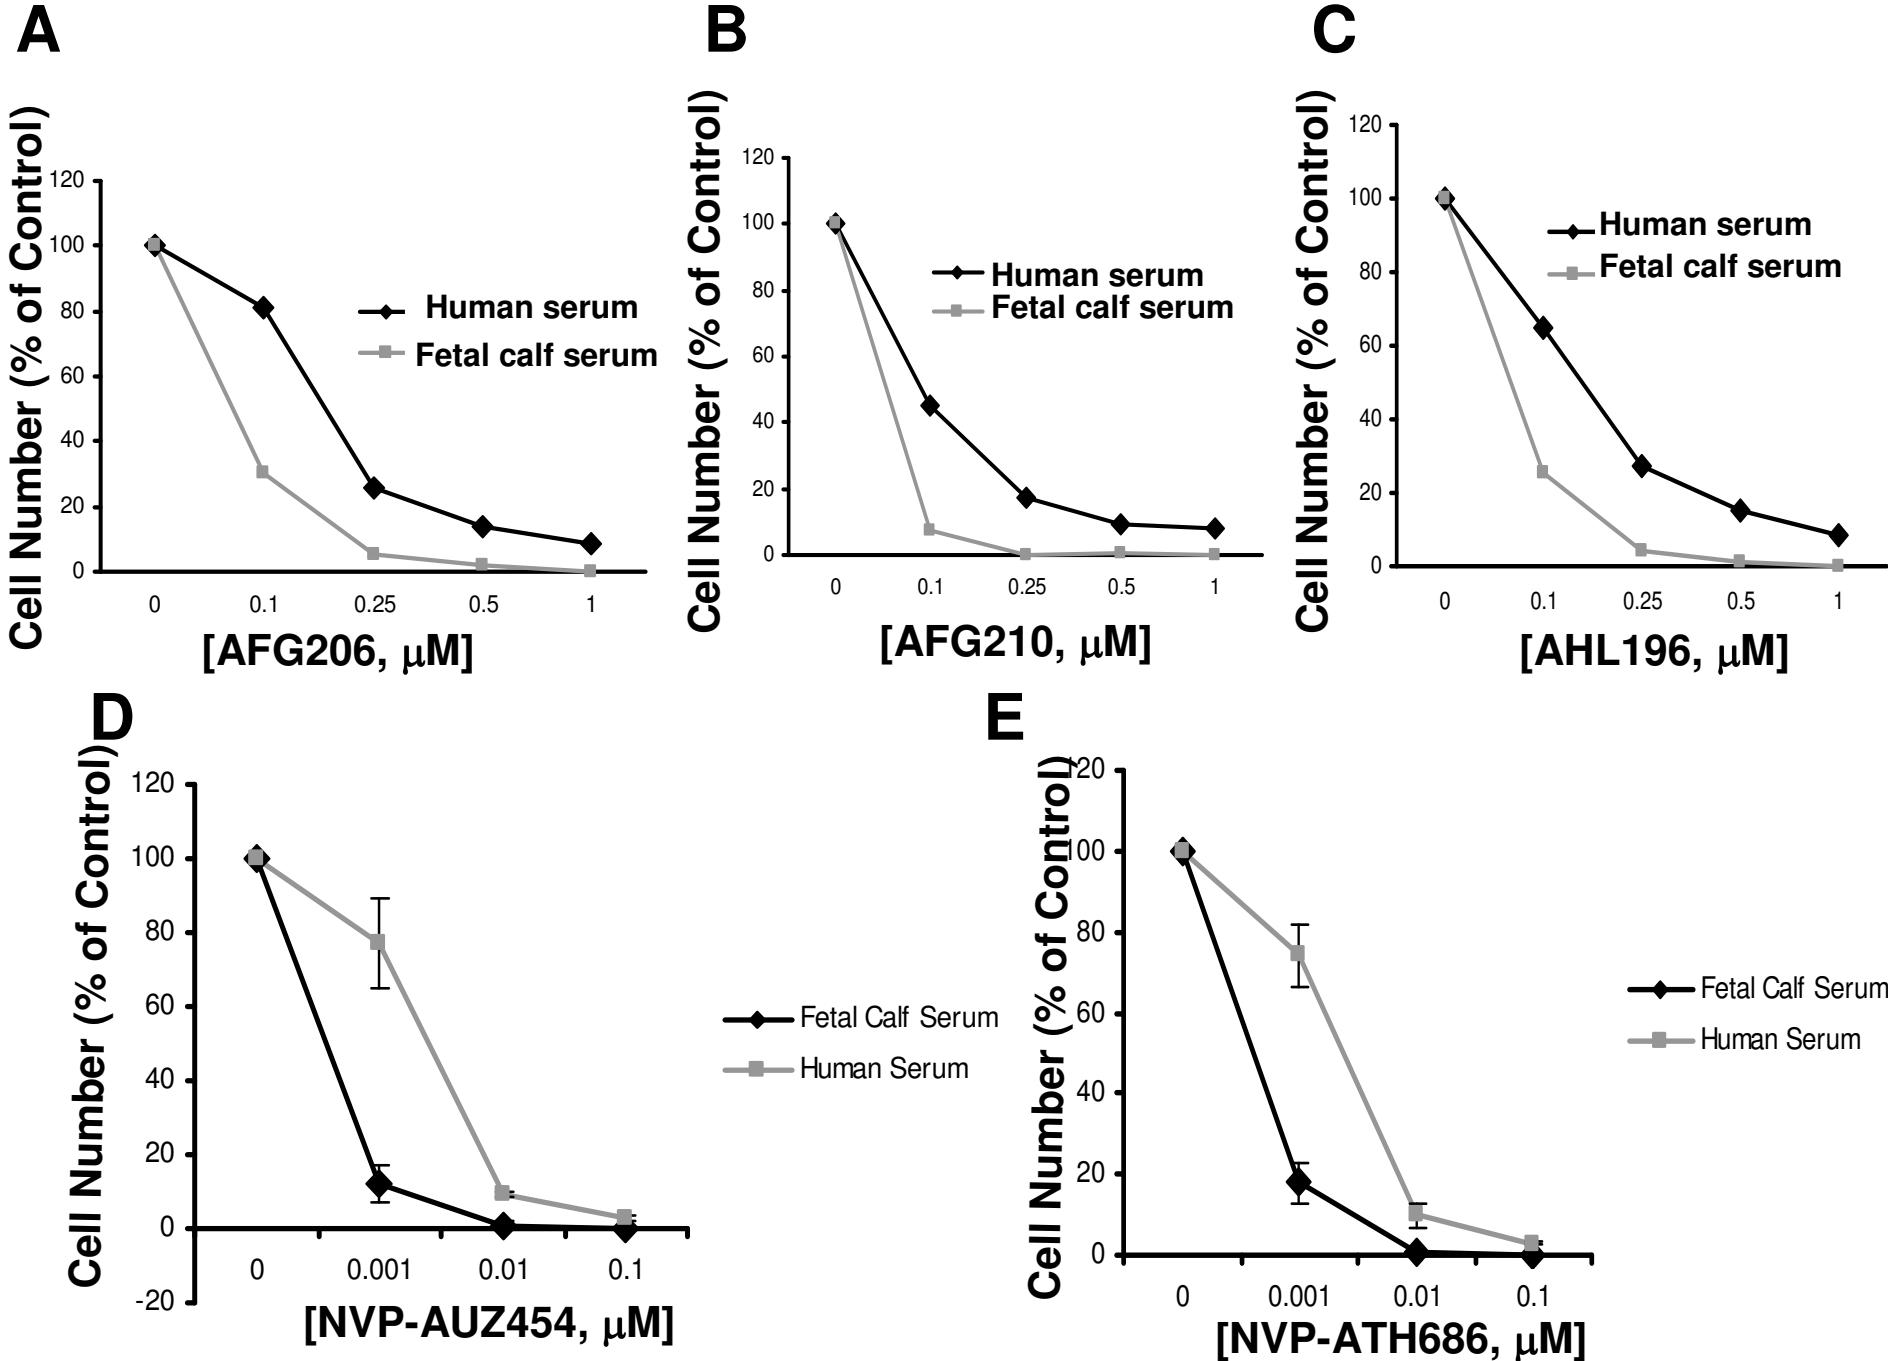

Fig S11

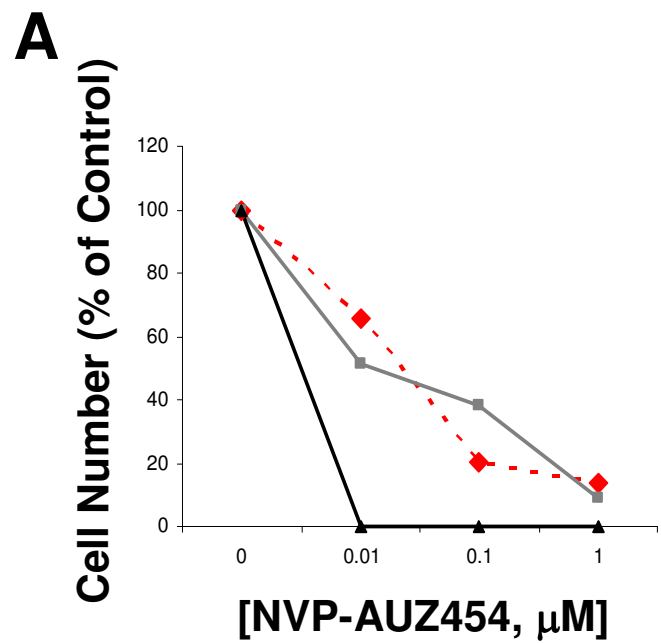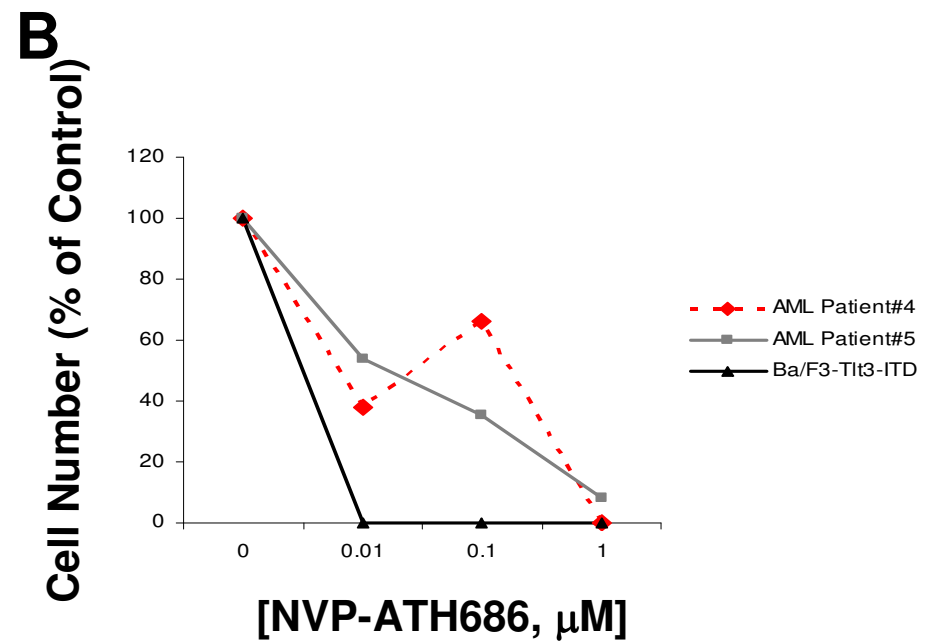

Fig S12

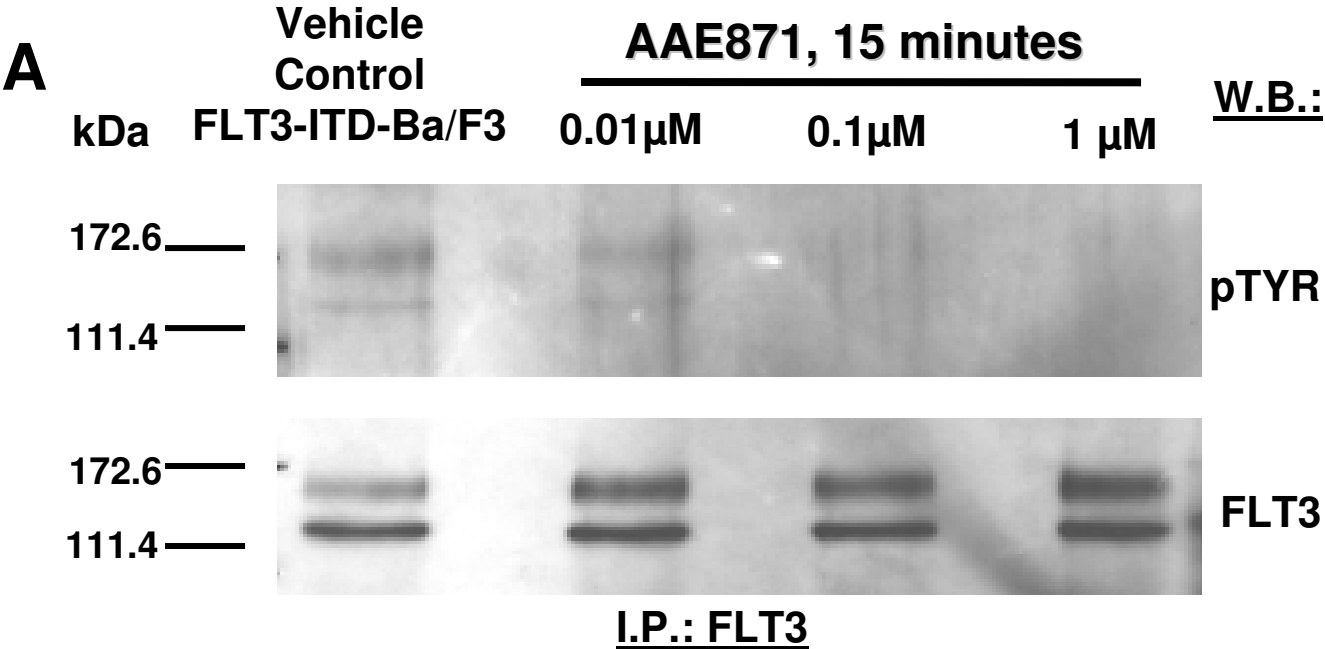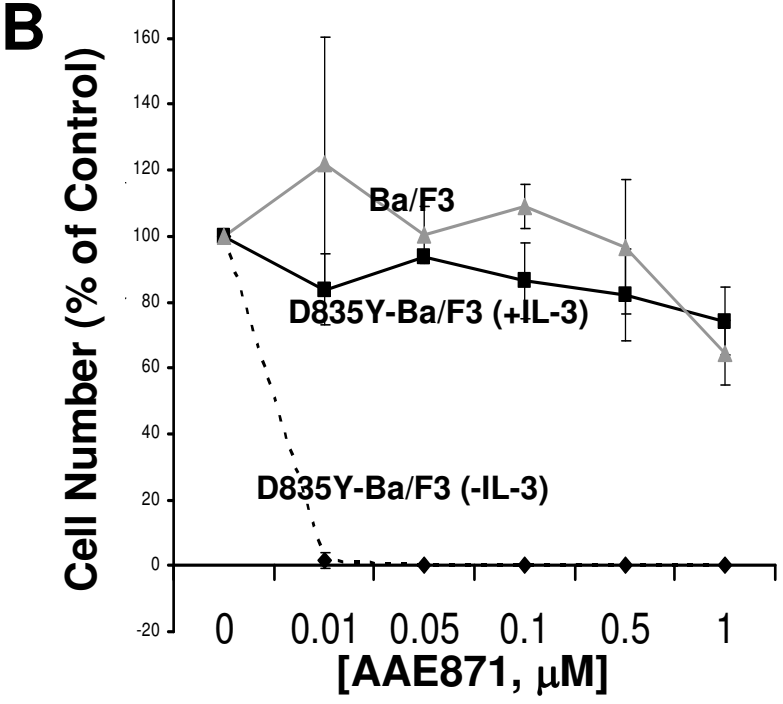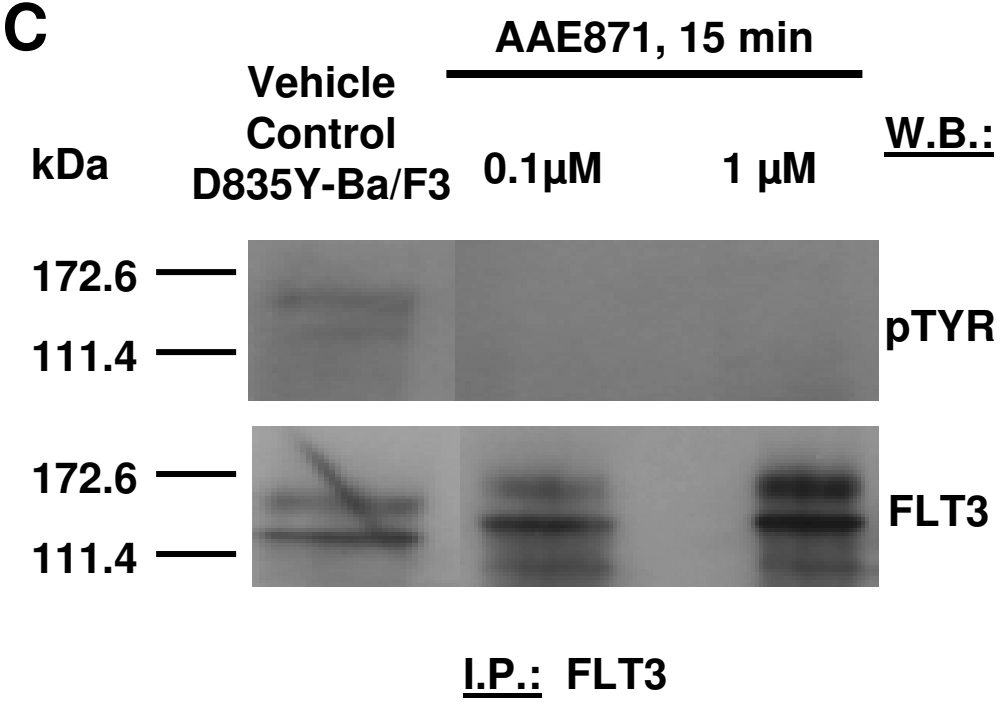



Fig S13 (A-B)

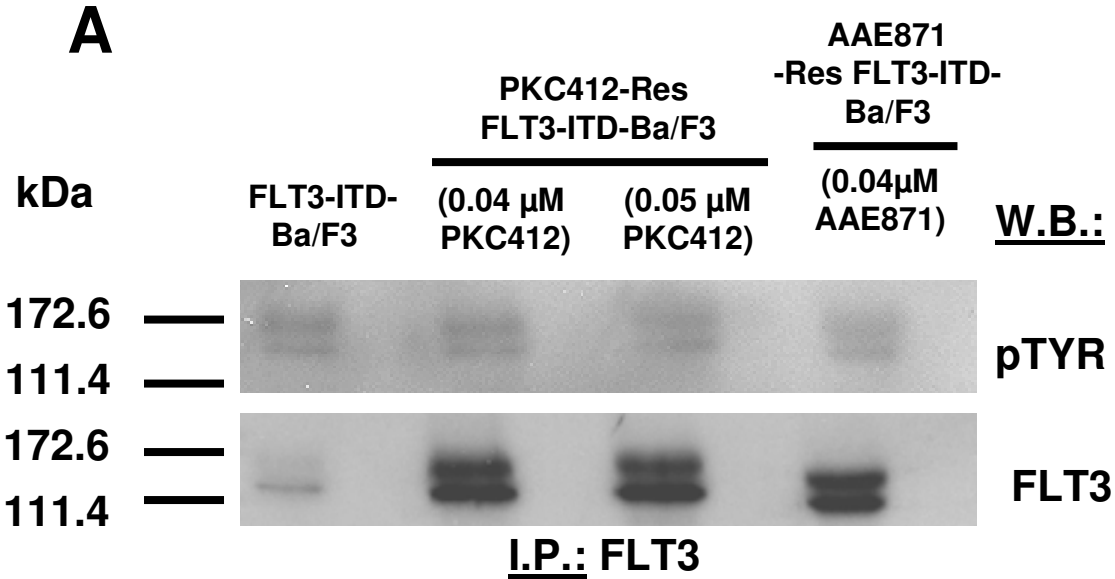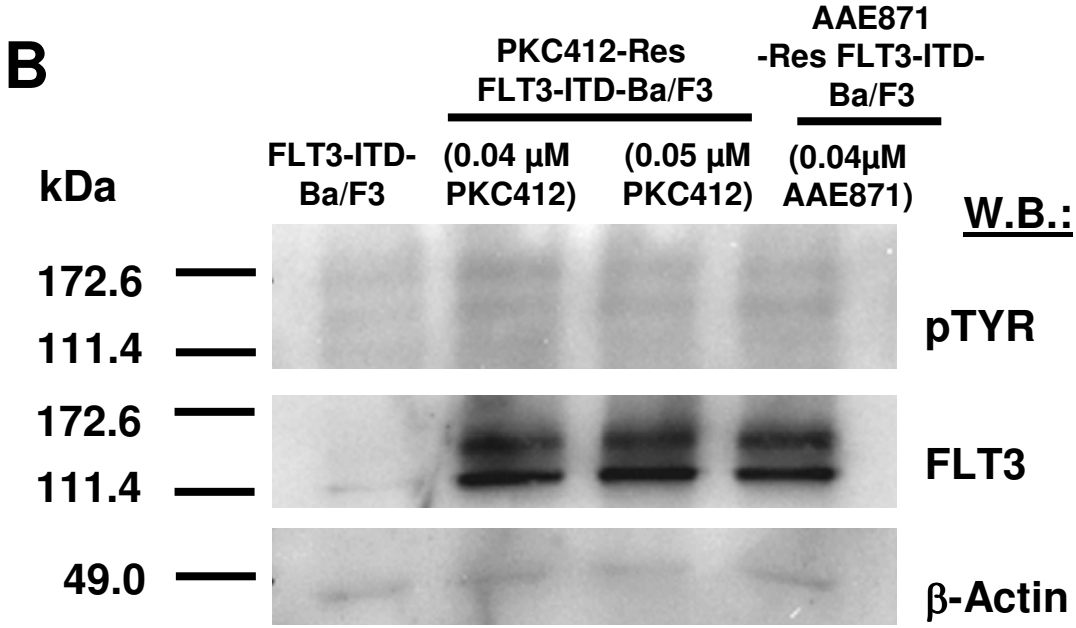

Fig S13 (C-D)

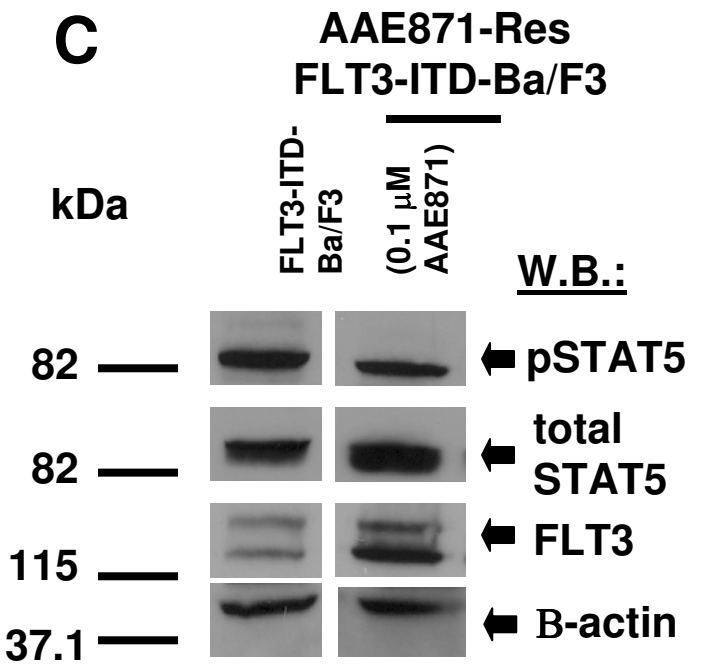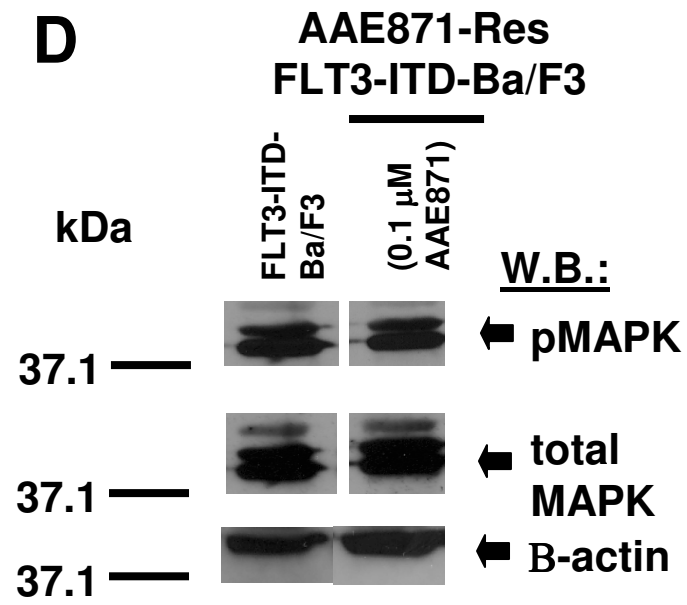

**Fig S14**

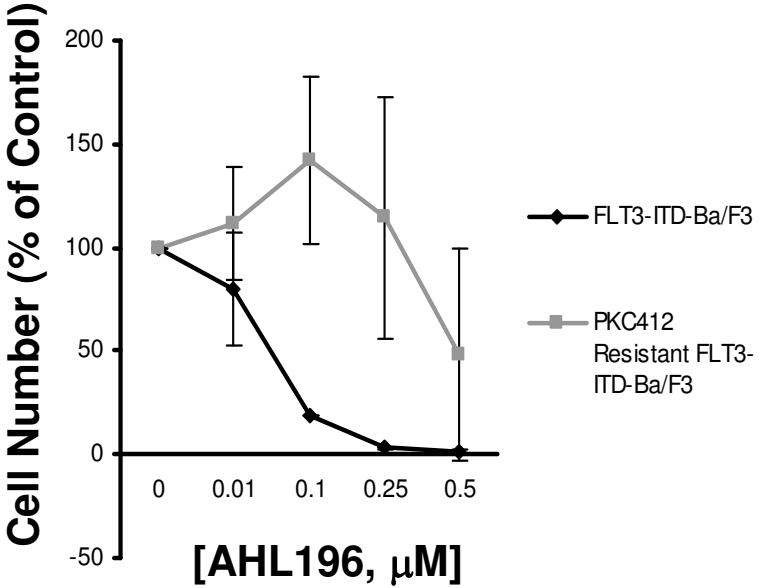

Supplement: supp_1947601910396505_DS_10.1177_1947601910396505_all.pdf [file supp_1947601910396505_DS_10.1177_1947601910396505_all.pdf]
